# Supplementary material
Source: Springer Nature journal article supplement (https://www.springermedizin.de/resource/supplementary/12889_2011_3612_MOESM9_ESM.pdf/9489470)
Supplement: MOESM9 [file 9489470]

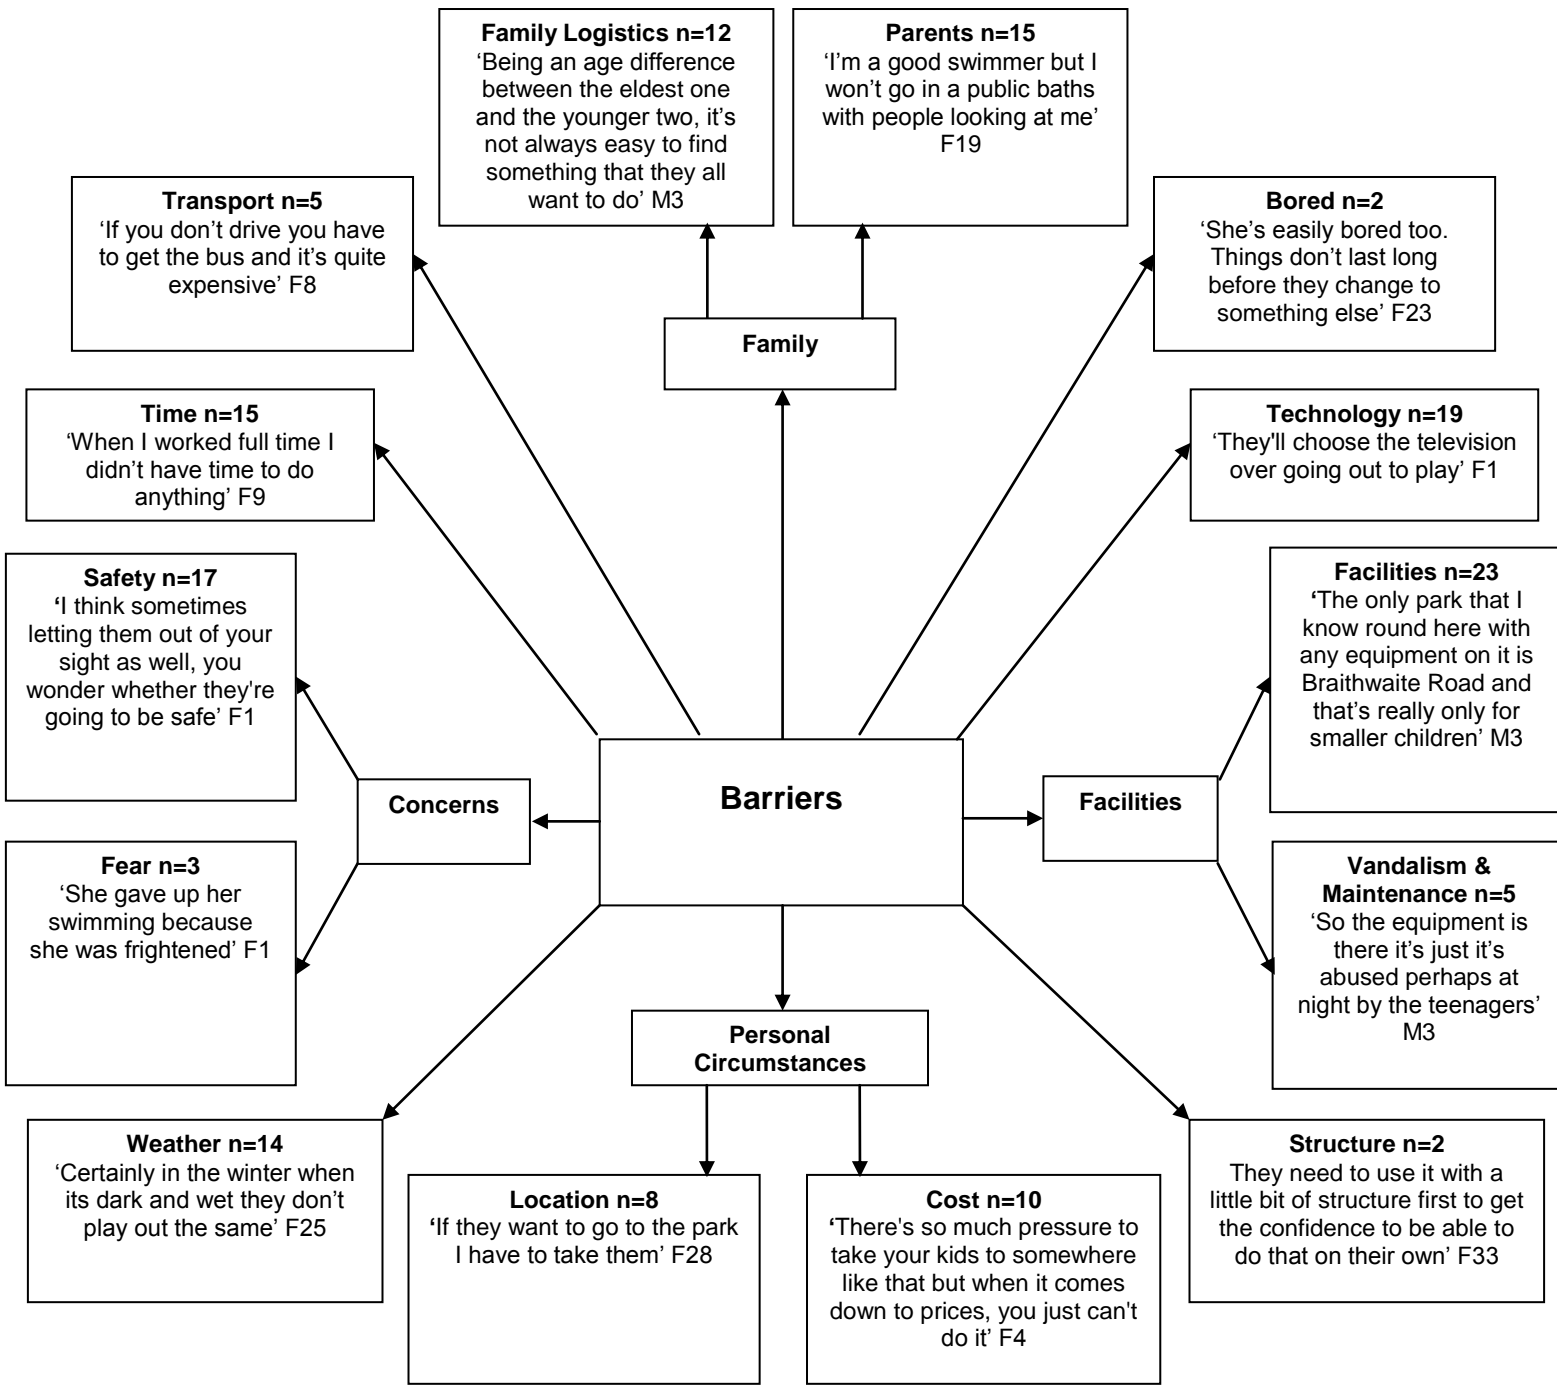

**Barriers**

**Concerns**

**Facilities**

**Personal Circumstances**

**Transport n=5**  
'If you don't drive you have to get the bus and it's quite expensive' F8

**Family Logistics n=12**  
'Being an age difference between the eldest one and the younger two, it's not always easy to find something that they all want to do' M3

**Parents n=15**  
'I'm a good swimmer but I won't go in a public baths with people looking at me' F19

**Bored n=2**  
'She's easily bored too. Things don't last long before they change to something else' F23

**Time n=15**  
'When I worked full time I didn't have time to do anything' F9

**Technology n=19**  
'They'll choose the television over going out to play' F1

**Safety n=17**  
'I think sometimes letting them out of your sight as well, you wonder whether they're going to be safe' F1

**Facilities n=23**  
'The only park that I know round here with any equipment on it is Braithwaite Road and that's really only for smaller children' M3

**Fear n=3**  
'She gave up her swimming because she was frightened' F1

**Vandalism & Maintenance n=5**  
'So the equipment is there it's just it's abused perhaps at night by the teenagers' M3

**Weather n=14**  
'Certainly in the winter when its dark and wet they don't play out the same' F25

**Location n=8**  
'If they want to go to the park I have to take them' F28

**Cost n=10**  
'There's so much pressure to take your kids to somewhere like that but when it comes down to prices, you just can't do it' F4

**Structure n=2**  
They need to use it with a little bit of structure first to get the confidence to be able to do that on their own' F33
